# Supplementary material for: Nurse-Led Consultation and Symptom Burden in Patients with Head and Neck Cancer: A Comparative Analysis of Routine Clinical Data
Source: MDPI journal article supplement (doi:10.3390/cancers14051227), 2022-02-26
Supplement: s1 [file s1]

Article

# Nurse-Led Consultation and Symptom Burden in Patients with Head and Neck Cancer: A Comparative Analysis of Routine Clinical Data

## Supplementary Materials:

Figure S1: Number and type of nursing interventions during radiotherapy treatment;

Table S1: Raw MD-HN mean scores by treatment group across three different times.

Table S2: Distribution of symptoms according to severity.

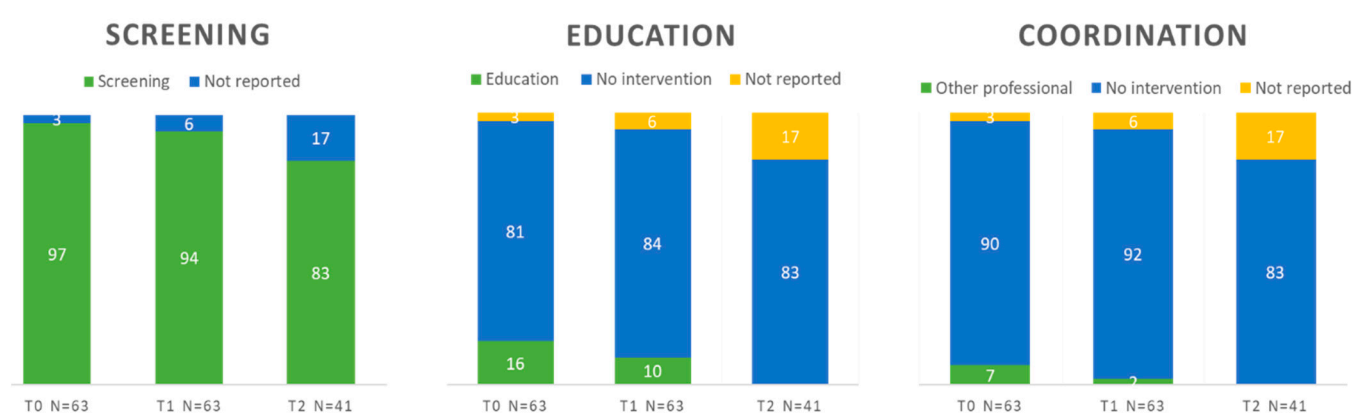

**Figure S1.** Number and type of nursing interventions during radiotherapy treatment.

**Table S1.** Raw MD-HN mean scores by treatment group across three time points.

| Period                             | Routine Care |              |             |              |             |              | Routine Care + Nurse Consultation |              |             |              |             |              |
|------------------------------------|--------------|--------------|-------------|--------------|-------------|--------------|-----------------------------------|--------------|-------------|--------------|-------------|--------------|
|                                    | T0           | T2           | T3          | T0           | T2          | T3           | T0                                | T2           | T3          | T0           | T2          | T3           |
| Core Symptoms (Mean. Median. IQR)  | Mean score   | Median (IQR) | Mea n (IQR) | Median (IQR) | Mea n (IQR) | Median (IQR) | Mea n (IQR)                       | Median (IQR) | Mea n (IQR) | Median (IQR) | Mea n (IQR) | Median (IQR) |
| Pain                               | 2.5          | 1 (5)        | 3.4         | 3 (4.5)      | 4.5         | 4.5 (4)      | 1.8                               | 1 (3)        | 3           | 3(3)         | 4           | 3 (4)        |
| Fatigue                            | 2.6          | 2 (5)        | 3.8         | 3.5 (4)      | 4.9         | 5 (4)        | 2.4                               | 2 (4)        | 3.8         | 3(3)         | 4.6         | 4.5 (3)      |
| Nausea                             | 0.6          | 0 (0)        | 1.4         | 0 (3)        | 2           | 1(3.5)       | 0.4                               | 0 (0)        | 1.5         | 0 (2)        | 2           | 1 (3)        |
| Disturbed sleep                    | 2.4          | 1.5 (3)      | 2.3         | 1(4)         | 2.5         | 2(5)         | 2.3                               | 2 (5)        | 2.6         | 2 (4)        | 2.7         | 2(2)         |
| Being distressed (worried)         | 2.8          | 2 (5)        | 2.7         | 2 (4)        | 2.8         | 2 (4.5)      | 2.9                               | 2 (5)        | 2.9         | 2 (4)        | 2.9         | 2 (4)        |
| Shortness of breath                | 1.6          | 0.5 (2)      | 1.9         | 1 (3)        | 2           | 1 (3)        | 1.3                               | 0(2)         | 1.9         | 1 (3)        | 1.9         | 1 (3)        |
| Difficulty remembering             | 1.4          | 0 (1.5)      | 1.4         | 0 (2)        | 1.7         | 1(3)         | 1.2                               | 0 (1)        | 1.4         | 1 (2)        | 1.4         | 0.5 (2)      |
| Lack of appetite                   | 1.6          | 0 (3)        | 3.1         | 2.5 (5)      | 4.3         | 4 (4.5)      | 1.7                               | 0 (3)        | 2.7         | 2 (4)        | 3.7         | 3 (5)        |
| Drowsiness                         | 1.7          | 1 (3)        | 2.3         | 2 (4)        | 3.2         | 2 (5.5)      | 1.4                               | 0 (2)        | 2.2         | 2 (3)        | 2.9         | 2 (4)        |
| Dry mouth                          | 2.4          | 1 (4)        | 4.7         | 5 (5)        | 5.2         | 5 (5)        | 2                                 | 1 (3)        | 4.3         | 4 (5)        | 4.9         | 5 (6)        |
| Sadness                            | 2.5          | 2 (4)        | 2.5         | 2 (4)        | 2.7         | 2 (4)        | 2.3                               | 1 (5)        | 2.9         | 2 (4)        | 2.9         | 2 (3)        |
| Vomiting                           | 0.6          | 0 (0)        | 0.6         | 0 (0.5)      | 1.5         | 0 (2)        | 0.2                               | 0 (0)        | 0.7         | 0 (0)        | 1           | 0 (1)        |
| Numbness/tingling                  | 1.6          | 0 (2)        | 1.1         | 0.5 (2)      | 1.7         | 1 (3)        | 1.1                               | 0 (2)        | 1.5         | 1 (2)        | 1.8         | 0 (2)        |
| <b>Head and neck symptoms</b>      |              |              |             |              |             |              |                                   |              |             |              |             |              |
| Mucus                              | 2.2          | 1 (4)        | 3.5         | 3 (5)        | 4.4         | 4 (4.5)      | 1.9                               | 1 (4)        | 3.7         | 3 (5)        | 4.6         | 4 (4)        |
| Difficulty with swallowing/chewing | 3            | 2 (5)        | 4.4         | 4 (5)        | 5.3         | 5 (5)        | 2.5                               | 1 (5)        | 3.8         | 3.5 (4)      | 4.6         | 4 (5)        |
| Coughing/choking                   | 1.8          | 1 (3)        | 1.7         | 1 (3)        | 3           | 2 (5)        | 1.2                               | 0 (2)        | 1.6         | 1 (2)        | 2.7         | 2 (5)        |
| Difficulty with voice/speech       | 2.6          | 2 (5)        | 3           | 2 (4)        | 3.9         | 4 (4.5)      | 2.5                               | 2 (4)        | 3.2         | 2 (5)        | 3.9         | 3 (5)        |
| Burning/rash                       | 1.2          | 0 (2)        | 2.5         | 2 (4.5)      | 4.4         | 4 (5.5)      | 0.9                               | 0 (1)        | 2.3         | 1.5 (4)      | 3.9         | 3.5 (5)      |
| Constipation                       | 1            | 0 (1)        | 1.8         | 0 (3)        | 2.7         | 2 (4.5)      | 1.4                               | 0 (2)        | 2.2         | 1 (3)        | 2.4         | 1.5 (3)      |
| Problem with tasting food          | 1.4          | 0 (2)        | 4           | 3 (6)        | 5.8         | 6 (6)        | 1.6                               | 0(2)         | 3.7         | 2.5 (5)      | 5.2         | 5 (7)        |
| Mouth/throat sores                 | 1.7          | 1 (2.5)      | 3.4         | 2 (6)        | 4.4         | 4 (5.5)      | 1.7                               | 0 (3)        | 3.5         | 2 (5)        | 4.3         | 4 (6)        |
| Problem with teeth or gums         | 1.5          | 0 (2)        | 2.3         | 1 (4)        | 2.8         | 2 (5)        | 1.9                               | 0 (3)        | 3           | 2 (5)        | 3           | 2 (4)        |
| <b>Interference symptoms</b>       |              |              |             |              |             |              |                                   |              |             |              |             |              |
| General activity                   | 2.6          | 2 (5)        | 3.4         | 3 (4)        | 4           | 4 (4)        | 3                                 | 2.5 (5)      | 3.4         | 3 (4)        | 4.1         | 3 (4)        |
| Work                               | 2.9          | 2 (6)        | 3.8         | 3 (7)        | 3.6         | 3 (5)        | 3.1                               | 2 (5)        | 3.4         | 3 (5)        | 4           | 4 (6)        |
| Walking                            | 2            | 1 (4)        | 2.2         | 1 (4)        | 2.7         | 2 (5)        | 1.7                               | 0 (3)        | 2           | 1 (3)        | 1.7         | 1 (2)        |

**Table S2.** Distribution of symptoms according to severity.

| Period                            | Routine Care |      |      | Nurse Consultations |      |      |
|-----------------------------------|--------------|------|------|---------------------|------|------|
|                                   | T0           | T1   | T2   | T0                  | T1   | T2   |
| Core symptoms                     | %            | %    | %    | %                   | %    | %    |
| <b>Pain</b>                       |              |      |      |                     |      |      |
| Mild                              | 73.6         | 66.7 | 50   | 85.5                | 75.8 | 67.7 |
| Moderate                          | 8.3          | 13.9 | 18.1 | 4.8                 | 12.9 | 8.1  |
| Severe                            | 18.1         | 19.4 | 31.9 | 9.7                 | 11.3 | 24.2 |
| <b>Fatigue</b>                    |              |      |      |                     |      |      |
| Mild                              | 73.6         | 62.5 | 40.3 | 80.6                | 62.9 | 50   |
| Moderate                          | 18.1         | 19.4 | 29.2 | 9.7                 | 19.3 | 25.8 |
| Severe                            | 8.3          | 18.1 | 30.6 | 9.7                 | 17.7 | 24.2 |
| <b>Nausea</b>                     |              |      |      |                     |      |      |
| Mild                              | 93.1         | 88.9 | 77.8 | 98.4                | 87.1 | 83.9 |
| Moderate                          | 5.6          | 8.3  | 11.1 | 1.6                 | 6.4  | 3.2  |
| Severe                            | 1.3          | 2.8  | 11.1 | 0                   | 6.4  | 12.9 |
| <b>Disturbed sleep</b>            |              |      |      |                     |      |      |
| Mild                              | 77.8         | 76.4 | 70.8 | 70.9                | 77.4 | 79   |
| Moderate                          | 8.3          | 13.9 | 20.8 | 24.2                | 11.3 | 11.3 |
| Severe                            | 13.9         | 9.7  | 8.3  | 4.8                 | 11.3 | 9.7  |
| <b>Being distressed (worried)</b> |              |      |      |                     |      |      |
| Mild                              | 70.8         | 76.4 | 75   | 69.3                | 74.2 | 72.6 |
| Moderate                          | 19.4         | 9.7  | 11.1 | 16.1                | 14.5 | 12.9 |
| Severe                            | 9.7          | 13.9 | 13.9 | 14.5                | 11.3 | 14.5 |
| <b>Shortness of breath</b>        |              |      |      |                     |      |      |
| Mild                              | 90.3         | 83.3 | 84.7 | 87.1                | 85.5 | 82.3 |
| Moderate                          | —            | 9.7  | 8.3  | 9.7                 | 4.8  | 8.1  |
| Severe                            | 9.7          | 6.9  | 8.3  | 3.2                 | 9.7  | 9.7  |
| <b>Difficulty remembering</b>     |              |      |      |                     |      |      |
| Mild                              | 88.9         | 88.9 | 87.5 | 90.3                | 88.7 | 90.3 |
| Moderate                          | 2.8          | 2.8  | 6.9  | 4.8                 | 6.4  | 4.8  |
| Severe                            | 8.3          | 8.3  | 5.6  | 4.8                 | 4.8  | 4.8  |
| <b>Lack of appetite</b>           |              |      |      |                     |      |      |
| Mild                              | 86.1         | 69.4 | 55.6 | 85.5                | 77.4 | 59.7 |
| Moderate                          | 8.3          | 15.3 | 19.4 | 4.8                 | 8.1  | 20.9 |
| Severe                            | 5.6          | 15.3 | 25   | 9.8                 | 14.5 | 19.3 |
| <b>Drowsiness</b>                 |              |      |      |                     |      |      |
| Mild                              | 81.9         | 79.2 | 66.7 | 88.7                | 82.3 | 74.2 |
| Moderate                          | 12.5         | 12.5 | 12.5 | 9.7                 | 11.3 | 14.5 |
| Severe                            | 5.6          | 8.3  | 20.8 | 1.6                 | 6.4  | 11.3 |
| <b>Dry mouth</b>                  |              |      |      |                     |      |      |
| Mild                              | 76.4         | 48.6 | 40.3 | 83.8                | 58.1 | 45.2 |
| Moderate                          | 12.5         | 22.2 | 20.8 | 8.1                 | 12.9 | 16.1 |
| Severe                            | 11.1         | 29.2 | 38.9 | 8.1                 | 29   | 38.7 |
| <b>Sadness</b>                    |              |      |      |                     |      |      |
| Mild                              | 76.4         | 77.8 | 77.8 | 74.2                | 75.8 | 75.8 |
| Moderate                          | 15.3         | 9.7  | 8.3  | 16.1                | 6.4  | 4.8  |
| Severe                            | 8.3          | 12.5 | 13.9 | 9.7                 | 17.7 | 19.3 |

|                                           |      |      |      |      |      |      |  |
|-------------------------------------------|------|------|------|------|------|------|--|
| <b>Vomiting</b>                           |      |      |      |      |      |      |  |
| Mild                                      | 97.2 | 95.8 | 86.1 | 100  | 91.9 | 90.3 |  |
| Moderate                                  | —    | 4.2  | 5.6  | —    | 4.8  | 1.6  |  |
| Severe                                    | 2.8  | —    | 8.3  | —    | 3.2  | 8.1  |  |
| <b>Numbness/tingling</b>                  |      |      |      |      |      |      |  |
| Mild                                      | 86.1 | 94.4 | 91.7 | 87.1 | 87.1 | 80.6 |  |
| Moderate                                  | 6.9  | 4.2  | 2.8  | 11.3 | 8.1  | 8    |  |
| Severe                                    | 6.9  | 1.4  | 5.6  | 1.6  | 4.8  | 11.3 |  |
| <b>Head and neck symptoms</b>             |      |      |      |      |      |      |  |
| <b>Mucus</b>                              |      |      |      |      |      |      |  |
| Mild                                      | 80.6 | 59.7 | 56.9 | 79   | 58.1 | 51.6 |  |
| Moderate                                  | 6.9  | 25   | 18.1 | 17.7 | 20.9 | 19.3 |  |
| Severe                                    | 12.5 | 15.3 | 25   | 3.2  | 20.9 | 29   |  |
| <b>Difficulty with swallowing/chewing</b> |      |      |      |      |      |      |  |
| Mild                                      | 72.2 | 58.3 | 41.7 | 72.6 | 66.1 | 56.4 |  |
| Moderate                                  | 9.7  | 13.9 | 18.1 | 14.5 | 14.5 | 12.9 |  |
| Severe                                    | 18.1 | 27.8 | 40.3 | 12.9 | 19.3 | 30.6 |  |
| <b>Coughing/choking</b>                   |      |      |      |      |      |      |  |
| Mild                                      | 86.1 | 90.3 | 68.1 | 93.5 | 88.7 | 72.6 |  |
| Moderate                                  | 4.2  | 5.6  | 12.5 | 3.2  | 4.8  | 12.9 |  |
| Severe                                    | 9.7  | 4.2  | 19.4 | 3.2  | 6.4  | 14.5 |  |
| <b>Difficulty with voice/speech</b>       |      |      |      |      |      |      |  |
| Mild                                      | 73.6 | 70.8 | 59.7 | 77.4 | 61.3 | 59.7 |  |
| Moderate                                  | 12.5 | 16.7 | 16.7 | 11.3 | 20.9 | 16.1 |  |
| Severe                                    | 13.9 | 12.5 | 13.6 | 11.3 | 17.7 | 24.2 |  |
| <b>Burning/rash</b>                       |      |      |      |      |      |      |  |
| Mild                                      | 90.3 | 75   | 51.4 | 95.2 | 79   | 62.9 |  |
| Moderate                                  | 5.5  | 19.4 | 15.3 | 1.6  | 9.7  | 16.1 |  |
| Severe                                    | 4.2  | 5.6  | 33.3 | 3.2  | 11.3 | 20.9 |  |
| <b>Constipation</b>                       |      |      |      |      |      |      |  |
| Mild                                      | 91.7 | 84.7 | 75   | 87.1 | 83.8 | 82.3 |  |
| Moderate                                  | 4.2  | 5.6  | 8.3  | 8.1  | 3.2  | 3.2  |  |
| Severe                                    | 4.2  | 9.7  | 16.7 | 4.8  | 12.9 | 14.5 |  |
| <b>Problem with tasting food</b>          |      |      |      |      |      |      |  |
| Mild                                      | 88.9 | 58.3 | 36.1 | 83.8 | 67.7 | 46.7 |  |
| Moderate                                  | 5.6  | 13.9 | 18.1 | 9.7  | 8.1  | 9.7  |  |
| Severe                                    | 5.6  | 27.8 | 45.8 | 6.4  | 24.2 | 43.5 |  |
| <b>Mouth/throat sores</b>                 |      |      |      |      |      |      |  |
| Mild                                      | 86.1 | 65.3 | 54.2 | 87.1 | 64.5 | 54.8 |  |
| Moderate                                  | 6.9  | 12.5 | 15.3 | 3.2  | 12.9 | 16.1 |  |
| Severe                                    | 6.9  | 22.2 | 30.6 | 9.7  | 22.6 | 29   |  |
| <b>Problem with teeth or gums</b>         |      |      |      |      |      |      |  |
| Mild                                      | 86.1 | 76.4 | 72.2 | 80.6 | 72.6 | 69.3 |  |
| Mild                                      | 6.9  | 8.3  | 12.5 | 8.1  | 9.7  | 14.5 |  |
| Moderate                                  | 6.9  | 15.3 | 15.3 | 11.3 | 17.7 | 16.1 |  |
| Severe                                    |      |      |      |      |      |      |  |
| <b>Interference symptoms</b>              |      |      |      |      |      |      |  |
| <b>General activity</b>                   |      |      |      |      |      |      |  |

|                              |      |      |      |      |      |      |
|------------------------------|------|------|------|------|------|------|
| Mild                         | 69.4 | 72.2 | 52.8 | 62.9 | 64.5 | 59.7 |
| Moderate                     | 18.1 | 8.3  | 26.4 | 16.1 | 17.7 | 17.7 |
| Severe                       | 12.5 | 19.4 | 20.8 | 20.9 | 17.7 | 22.6 |
| <b>Work</b>                  |      |      |      |      |      |      |
| Mild                         | 69.4 | 65.3 | 59.7 | 67.7 | 59.7 | 56.4 |
| Moderate                     | 9.7  | 9.7  | 23.6 | 16.1 | 22.6 | 17.7 |
| Severe                       | 20.8 | 25   | 16.7 | 16.1 | 17.7 | 25.8 |
| <b>Relations with others</b> |      |      |      |      |      |      |
| Mild                         | 80.6 | 81.9 | 75   | 80.6 | 75.8 | 75.8 |
| Moderate                     | 9.7  | 8.3  | 15.3 | 12.9 | 12.9 | 16.1 |
| Severe                       | 9.7  | 9.7  | 9.7  | 6.4  | 6.4  | 8.1  |
| <b>Walking</b>               |      |      |      |      |      |      |
| Mild                         | 79.2 | 77.8 | 73.6 | 80.6 | 80.6 | 85.5 |
| Moderate                     | 13.9 | 12.5 | 13.9 | 9.7  | 9.7  | 9.7  |
| Severe                       | 6.9  | 9.7  | 12.5 | 9.7  | 9.7  | 4.8  |
| <b>Joy of living</b>         |      |      |      |      |      |      |
| Mild                         | 75   | 81.9 | 81.9 | 77.4 | 66.1 | 74.2 |
| Moderate                     | 11.1 | 4.2  | 4.2  | 4.8  | 12.9 | 8.1  |
| Severe                       | 13.9 | 13.9 | 13.9 | 17.7 | 20.9 | 17.7 |
